# Supplementary material for: Dynamics of CO 2 and CH 4 fluxes in Red Sea mangrove soils
Source: Copernicus journal article supplement (doi:10.5194/bg-22-117-2025), 2025-01-10

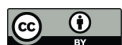

*Supplement of*

## **Dynamics of CO<sub>2</sub> and CH<sub>4</sub> fluxes in Red Sea mangrove soils**

**Jessica Breavington et al.**

*Correspondence to:* Jessica Breavington ([jessicabreavington@gmail.com](mailto:jessicabreavington@gmail.com))

The copyright of individual parts of the supplement might differ from the article licence.

Figure S1: Heat map of Spearman correlation coefficient matrix and respective p-values for soil, environmental, and temporal factors with greenhouse gas fluxes and stable isotope signatures. Water (mL) = mL of water in the core during incubation, C<sub>org</sub>-3cm = Organic carbon in the top 3 cm of soil, C<sub>inorg</sub>-3cm = Inorganic carbon in the top 3 cm of soil, C<sub>org</sub>-10cm = Organic carbon in the top 10 cm of soil, C<sub>inorg</sub>-10cm = Inorganic carbon in the top 3 cm of soil, BD-3cm = Bulk density of soil in the top 3 cm of soil, BD-10cm = Bulk density of soil in the top 10 cm of soil, WC-3cm = Water content in the top 3 cm of soil, WC-10cm = Water content in the top 10 cm of soil, EC 1:5 = Electrical conductivity.

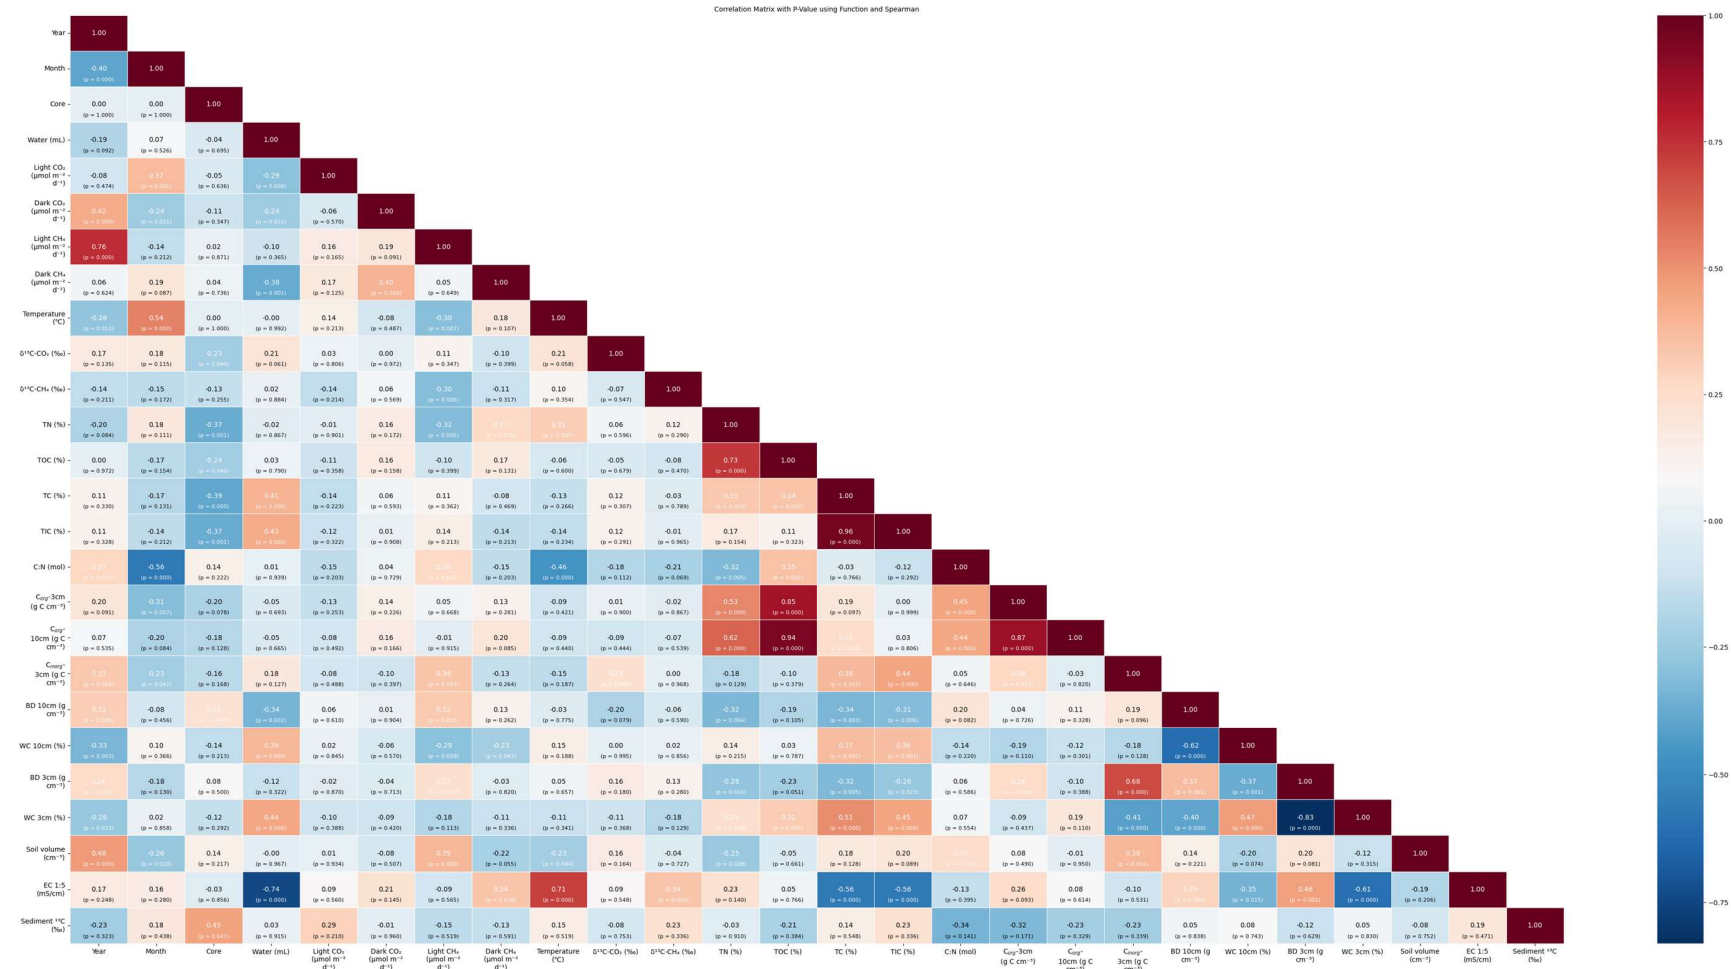

Supplement: Supplementary file 1 [file bg-22-117-2025-supplement.pdf]
